# Supplementary material for: Microbial Transformation and Biological Activities of the Prenylated Aromatic Compounds from Broussonetia kazinoki
Source: Molecules. 2022 Mar 14;27(6):1879. doi: 10.3390/molecules27061879 (PMC8954733; doi:10.3390/molecules27061879)
Supplement: Supplementary file 1 [file molecules-27-01879-s001.zip › molecules-1622589-supplementary.pdf]

## Article

# Microbial Transformation and Biological Activities of the Prenylated Aromatic Compounds from *Broussonetia kazinoki*

EunA Choi, Fubo Han, Jisu Park <sup>†</sup> and Ik-Soo Lee <sup>\*</sup>

College of Pharmacy, Chonnam National University, Gwangju 61186, Korea; 206412@jnu.ac.kr (E.C.); hanfubo0306@gmail.com (F.H.); qkrwltn9410@naver.com (J.P.)

<sup>\*</sup> Correspondence: islee@chonnam.ac.kr; Tel.: +82-62-530-2932

<sup>†</sup> Current address: Advanced Radiation Technology Institute, Korea Atomic Energy Research Institute, Jeongeup-si 56212, Korea

**Table S1.** Screening for the microorganisms that metabolize kazinol C (1) and F (3).

| Microorganism                                | Capability <sup>*</sup> |           |
|----------------------------------------------|-------------------------|-----------|
|                                              | Kazinol C               | Kazinol F |
| <i>A. alternata</i>                          | (-)                     | (+)       |
| <i>A. coerulea</i>                           | (-)                     | (+)       |
| <i>A. fumigatus</i>                          | (-)                     | (-)       |
| <i>A. oryzae</i>                             | (-)                     | (-)       |
| <i>C. elegans</i> var. <i>elegans</i>        | (-)                     | (-)       |
| <i>F. merismoides</i>                        | (-)                     | (-)       |
| <i>G. deliquescens</i>                       | (+)                     | (+)       |
| <i>G. cingulata</i>                          | (-)                     | (-)       |
| <i>H. resinae</i>                            | (-)                     | (-)       |
| <i>M. rubber</i>                             | (-)                     | (-)       |
| <i>M. ramanniana</i> var. <i>angulispora</i> | (-)                     | (-)       |
| <i>M. hiemalis</i>                           | (++)                    | (++)      |
| <i>P. chrysogenum</i>                        | (-)                     | (-)       |
| <i>T. koningii</i>                           | (-)                     | (-)       |

<sup>\*</sup> Capability of transformation Kazinol C (1) and F (3): (-) no transformation; (+) lower yield of metabolites; (++) higher yield of metabolites.

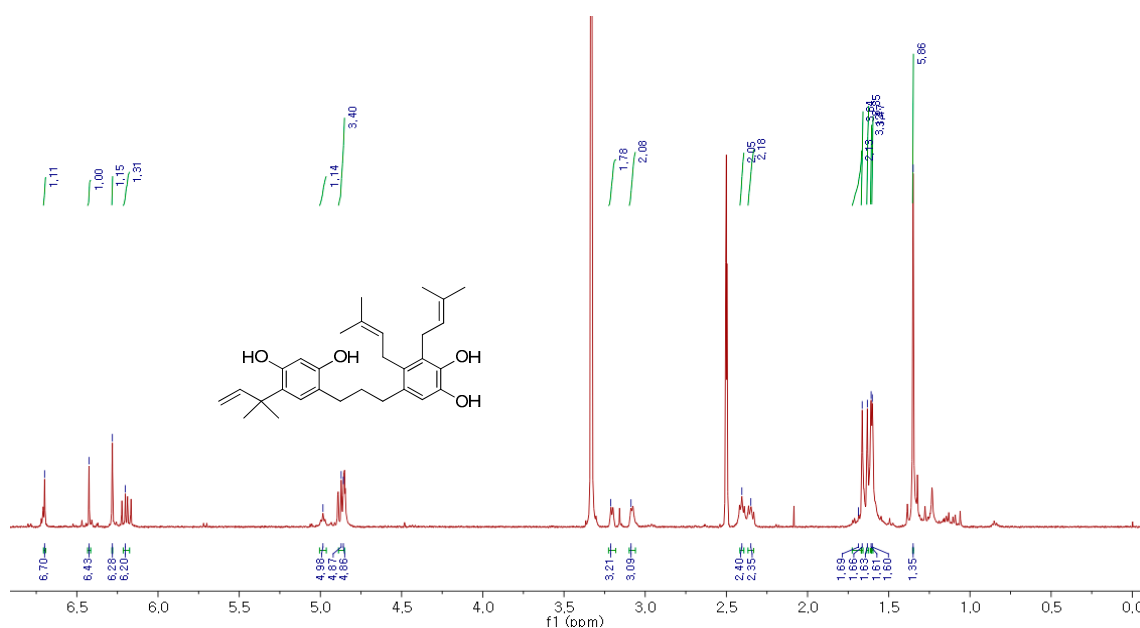

Figure S1. <sup>1</sup>H NMR spectrum of compound 1 recorded at 500 MHz in DMSO-*d*<sub>6</sub>.

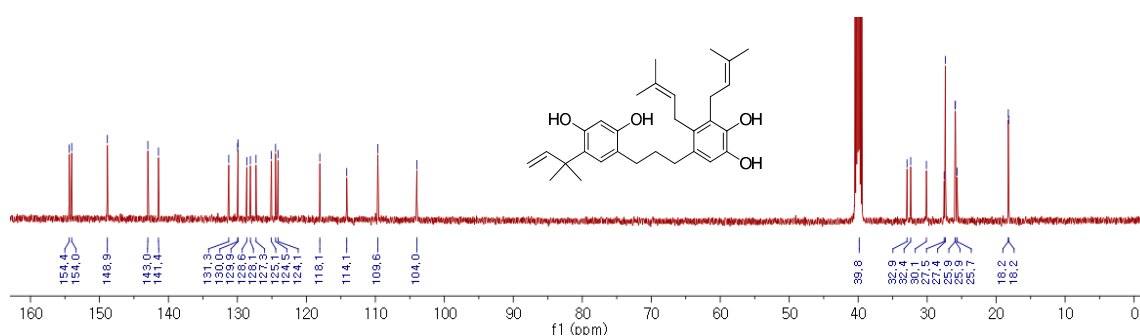

Figure S2. <sup>13</sup>C NMR spectrum of compound 1 recorded at 125 MHz in DMSO-*d*<sub>6</sub>.

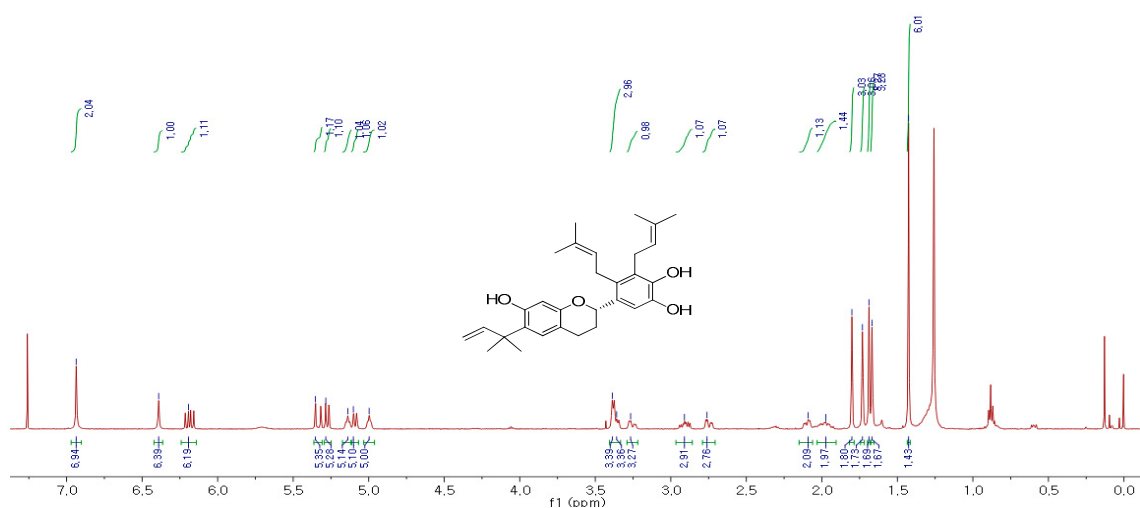

Figure S3. <sup>1</sup>H NMR spectrum of compound 2 recorded at 500 MHz in CDCl<sub>3</sub>.

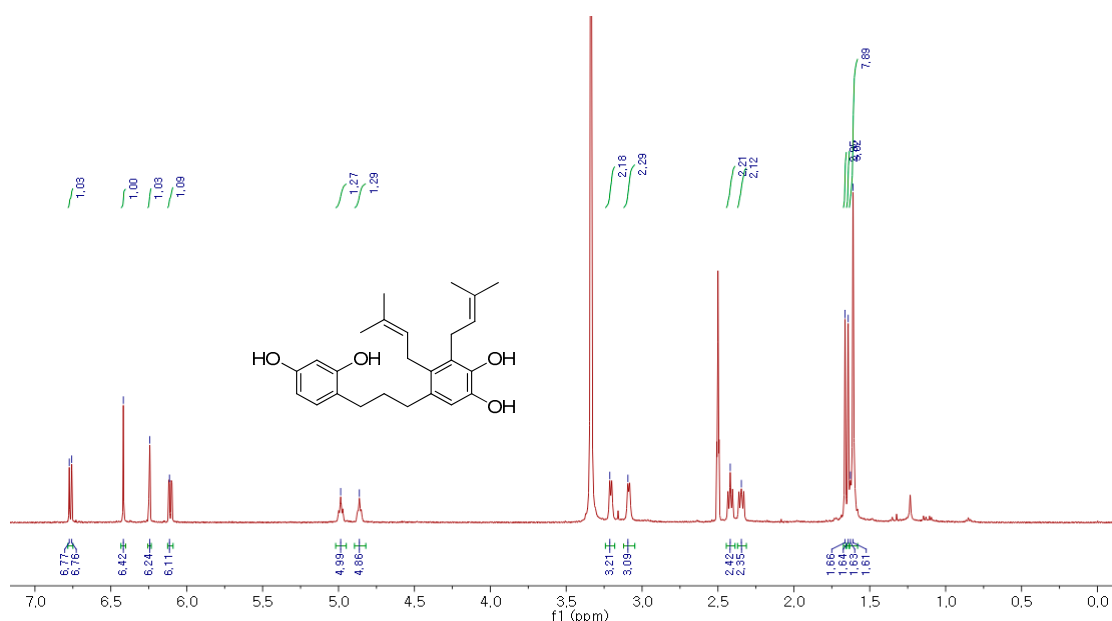

Figure S4. <sup>1</sup>H NMR spectrum of compound 3 recorded at 500 MHz in DMSO-*d*<sub>6</sub>.

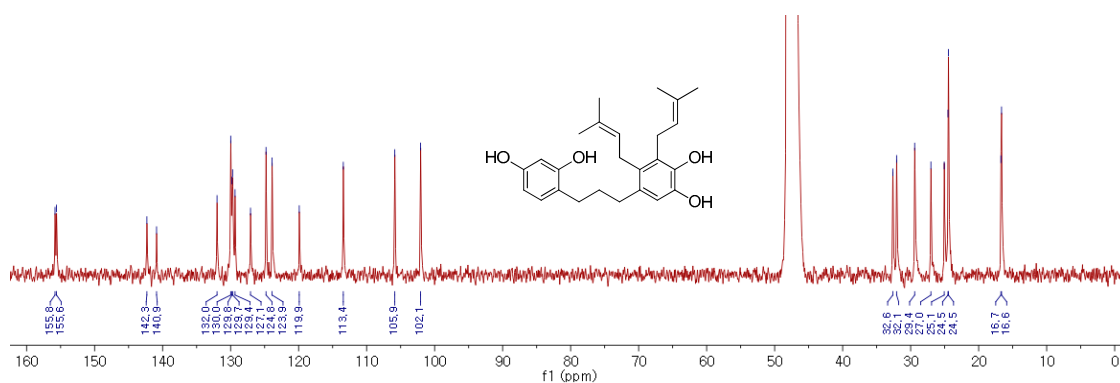

Figure S5. <sup>13</sup>C NMR spectrum of compound 3 recorded at 125 MHz in DMSO-*d*<sub>6</sub>.

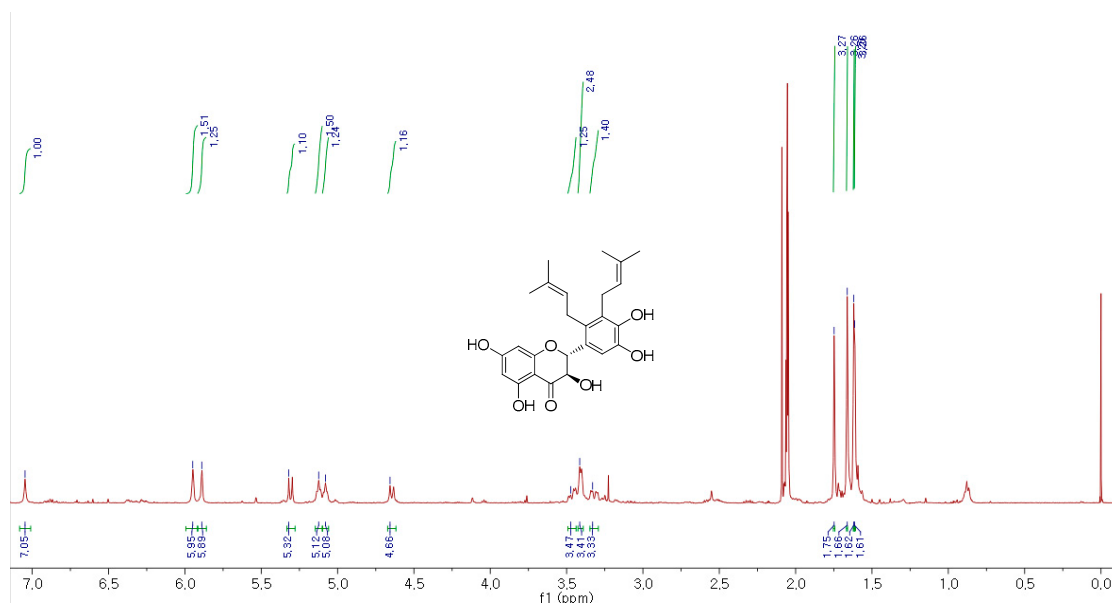

Figure S6. <sup>1</sup>H NMR spectrum of compound 4 recorded at 600 MHz in Acetone-*d*<sub>6</sub>.

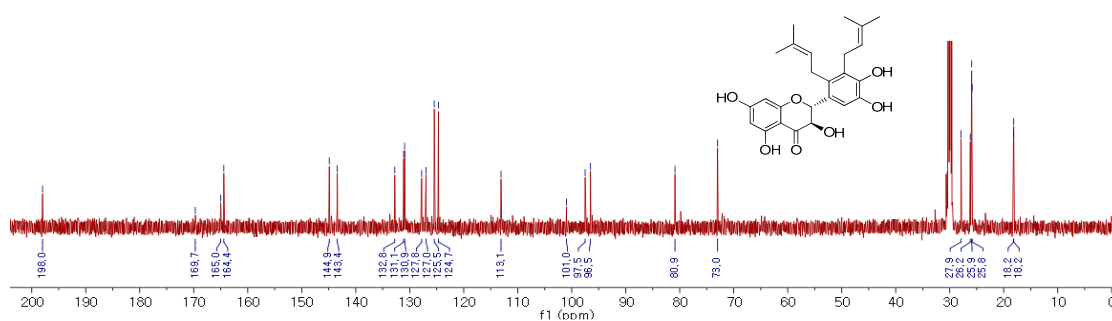

Figure S7. <sup>13</sup>C NMR spectrum of compound 4 recorded at 150 MHz in Acetone-*d*<sub>6</sub>.

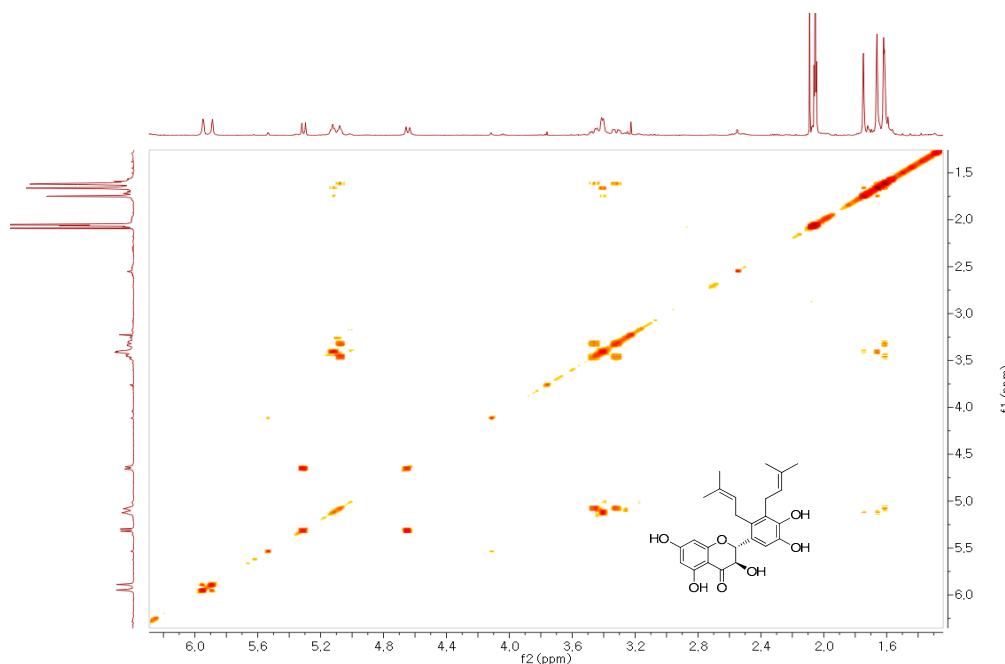

Figure S8. COSY spectrum of compound 4 recorded in Acetone-*d*<sub>6</sub>.

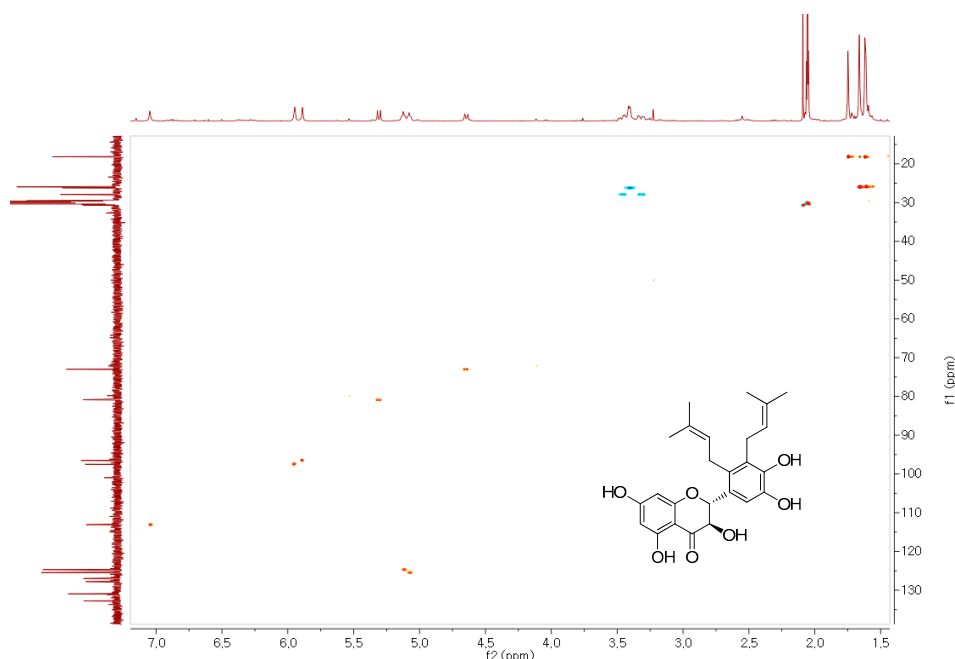

Figure S9. HSQC spectrum of compound 4 recorded in Acetone-*d*<sub>6</sub>.

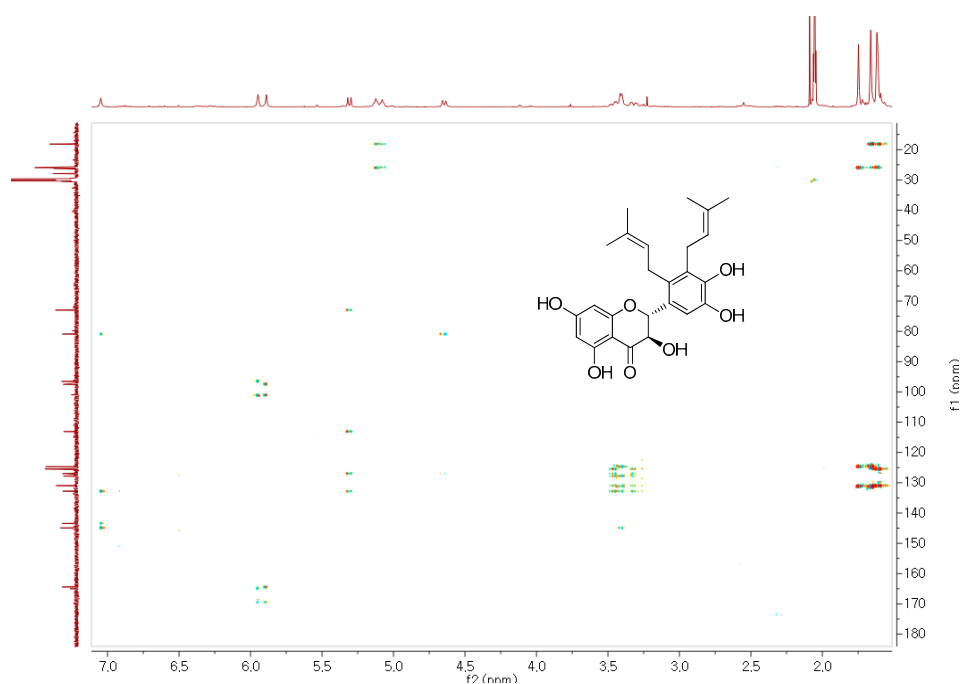

Figure S10. HMBC spectrum of compound 4 recorded in Acetone- $d_6$ .

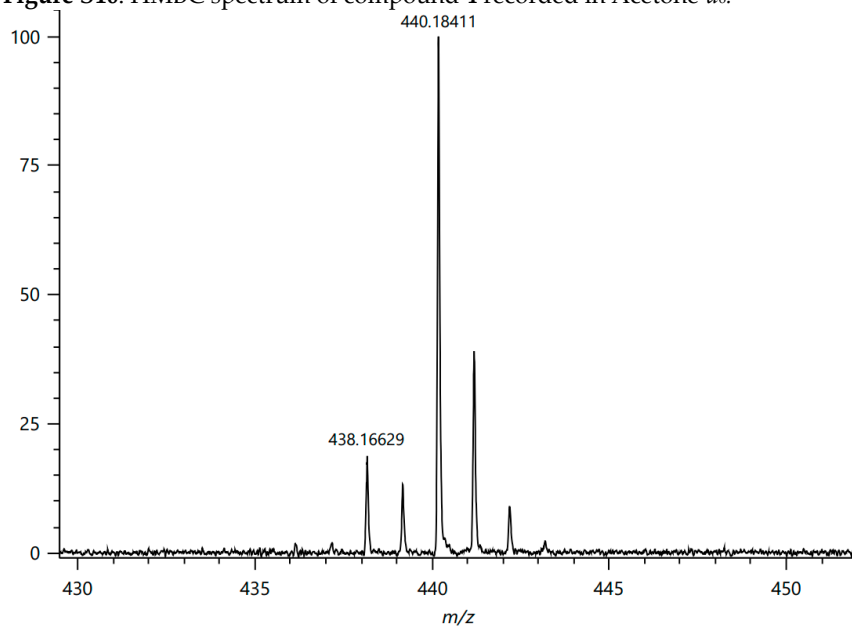

Figure S11. The HRFDMS spectrum of compound 4.

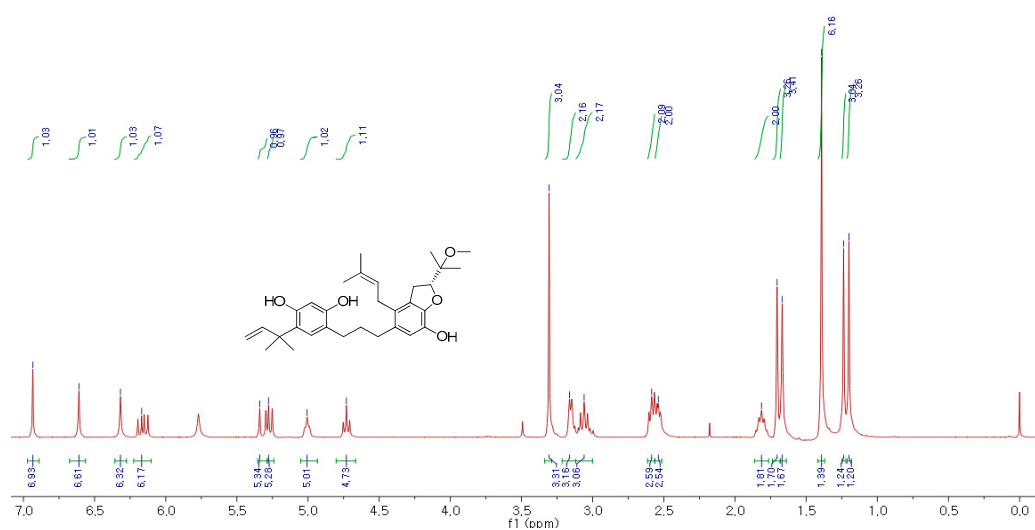

Figure S12. <sup>1</sup>H NMR spectrum of compound 5 recorded at 400 MHz in CDCl<sub>3</sub>.

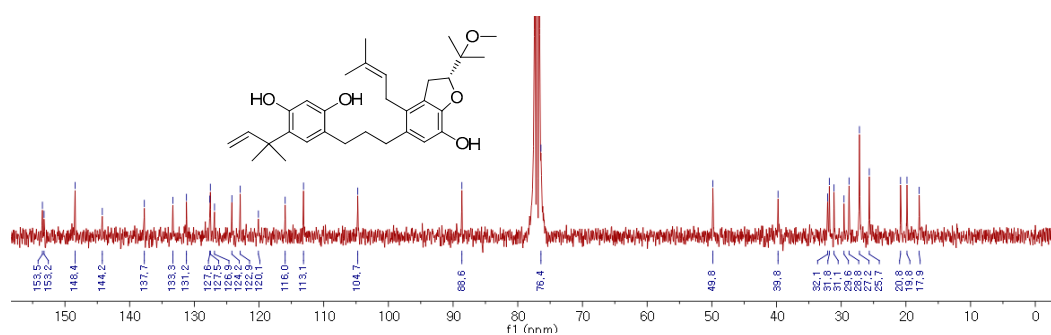

Figure S13. <sup>13</sup>C NMR spectrum of compound 5 recorded at 100 MHz in CDCl<sub>3</sub>.

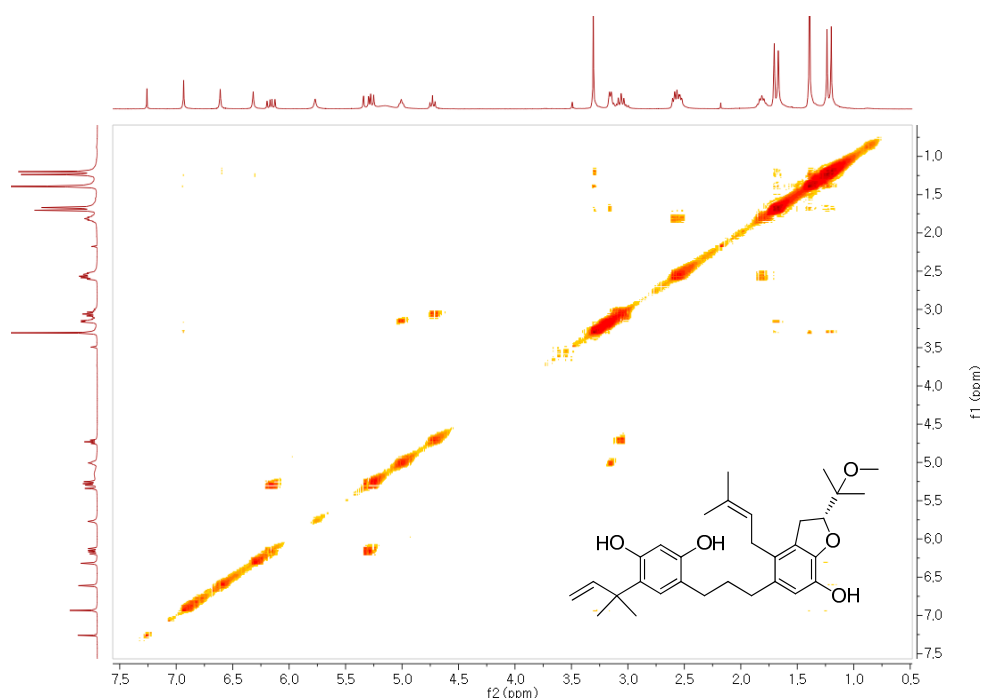

Figure S14. COSY spectrum of compound 5 recorded in CDCl<sub>3</sub>.

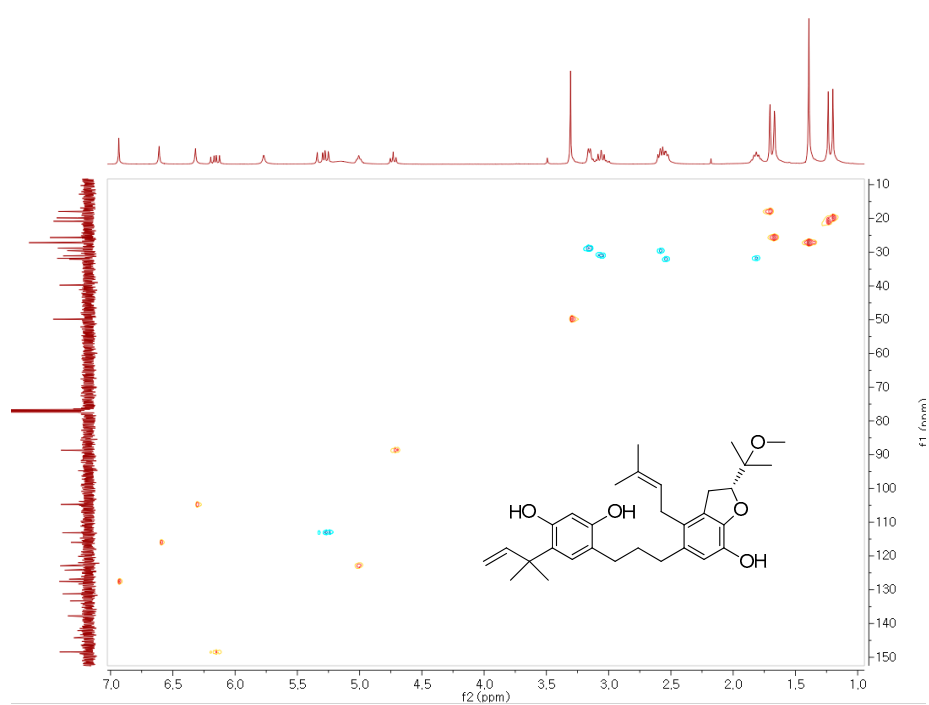

Figure S15. HSQC spectrum of compound 5 recorded in CDCl<sub>3</sub>.

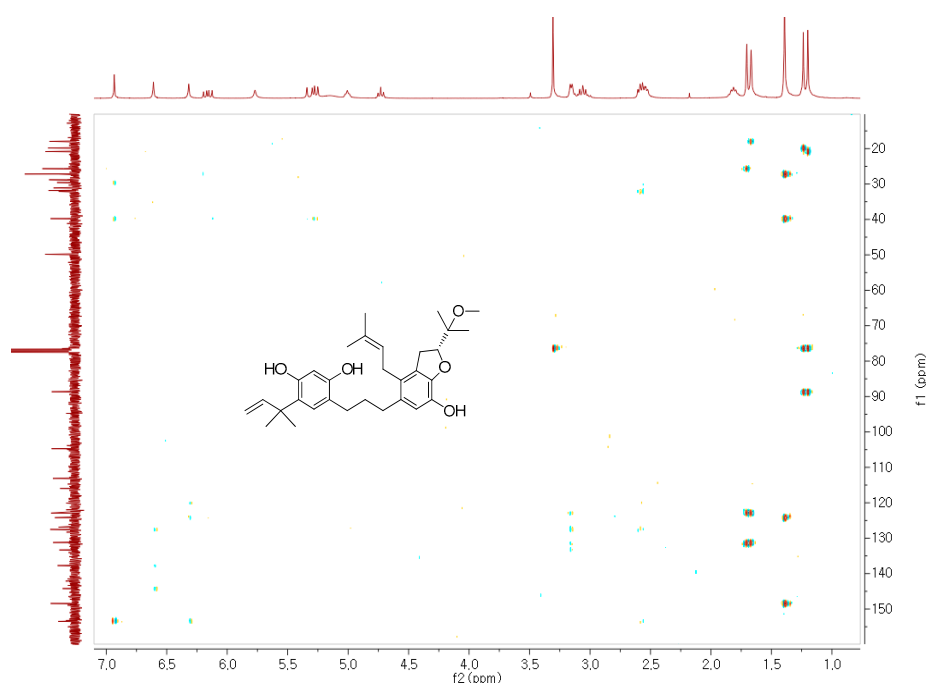

Figure S16. HMBC spectrum of compound 5 recorded in CDCl<sub>3</sub>.

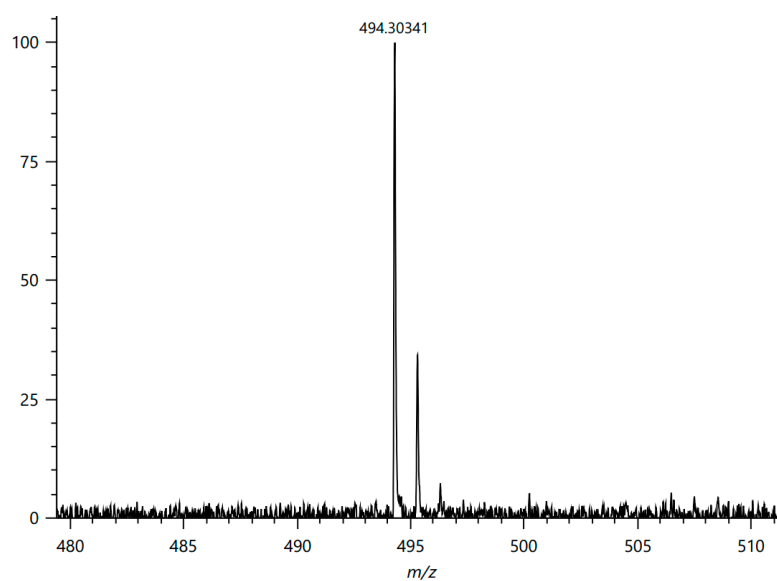

Figure S17. The HRFDMS spectrum of compound 5.

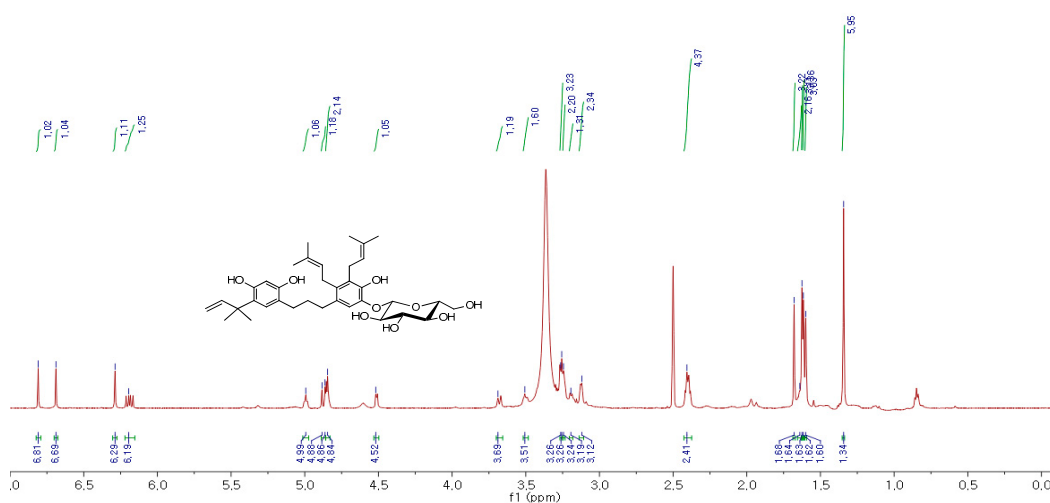

Figure S18.  $^1\text{H}$  NMR spectrum of compound 6 recorded at 600 MHz in  $\text{DMSO}-d_6$ .

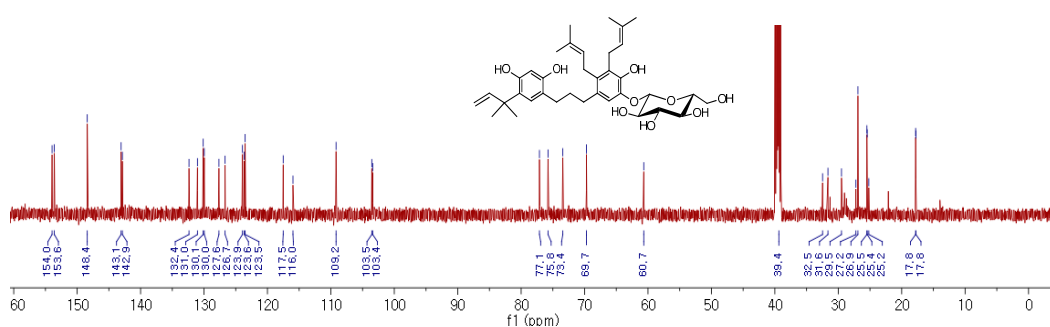

Figure S19.  $^{13}\text{C}$  NMR spectrum of compound 6 recorded at 150 MHz in  $\text{DMSO}-d_6$ .

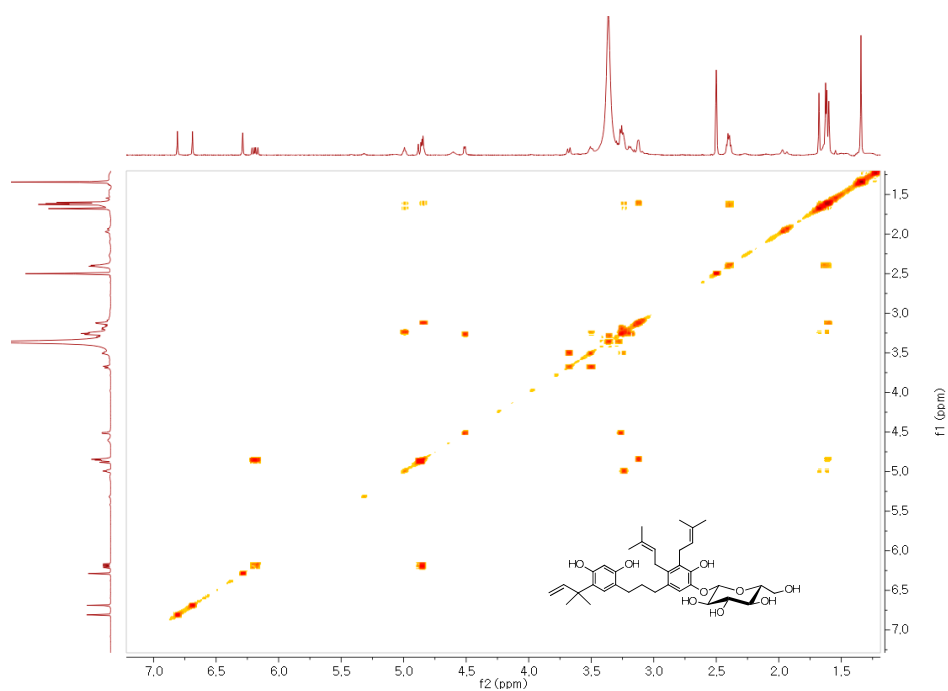

Figure S20. COSY spectrum of compound **6** recorded in DMSO-*d*<sub>6</sub>.

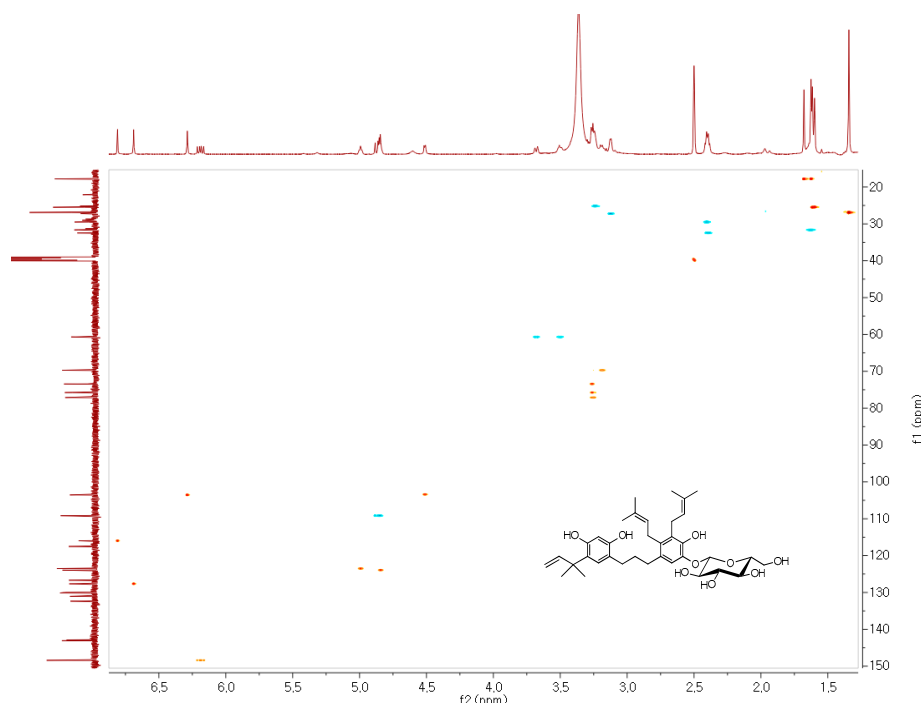

Figure S21. HSQC spectrum of compound **6** recorded in DMSO-*d*<sub>6</sub>.

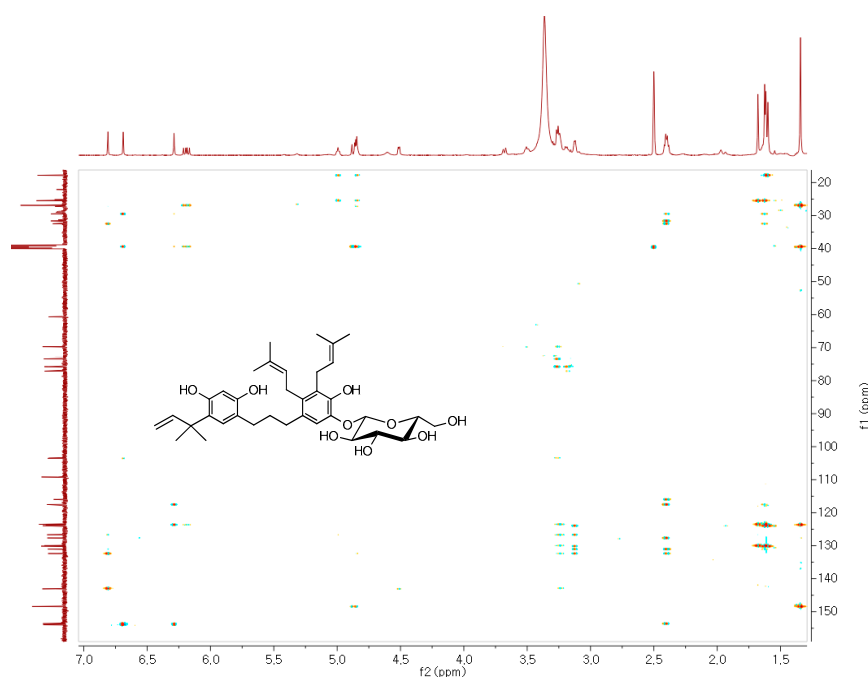

Figure S22. HMBC spectrum of compound 6 recorded in DMSO-*d*<sub>6</sub>.

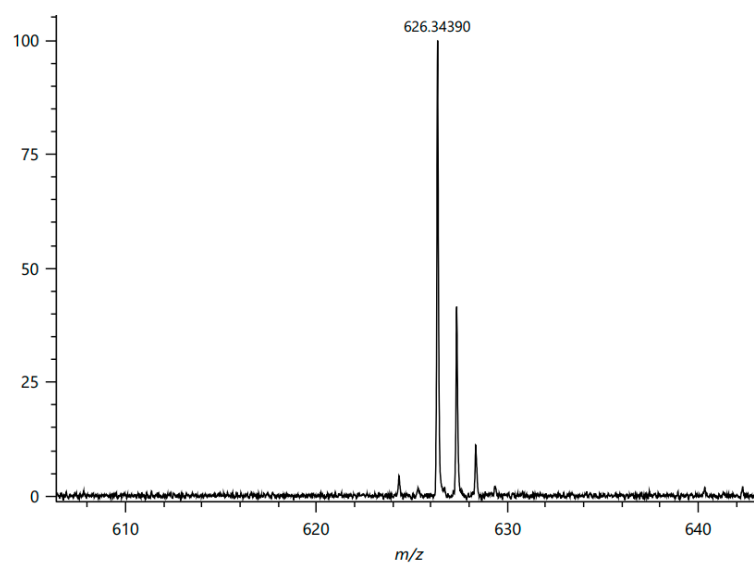

Figure S23. The HRFDMS spectrum of compound 6.

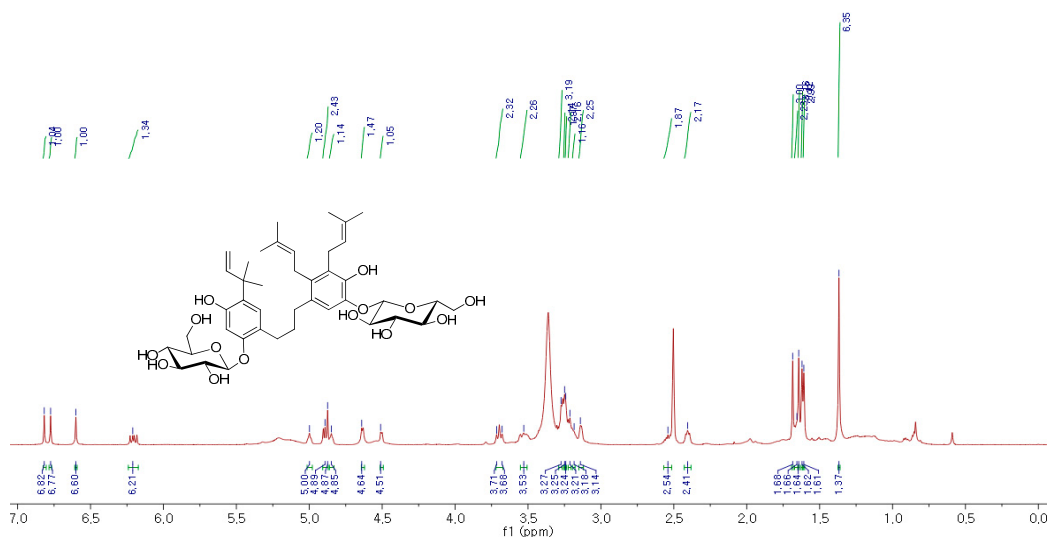

Figure S24. <sup>1</sup>H NMR spectrum of compound 7 recorded at 600 MHz in DMSO-*d*<sub>6</sub>.

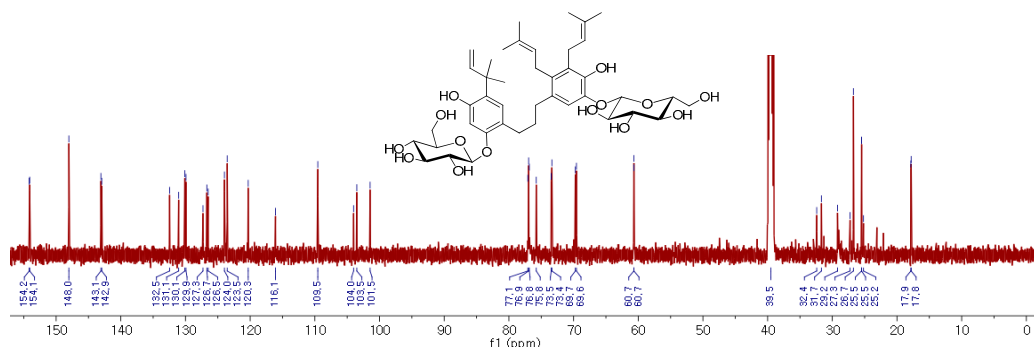

Figure S25. <sup>13</sup>C NMR spectrum of compound 7 recorded at 150 MHz in DMSO-*d*<sub>6</sub>.

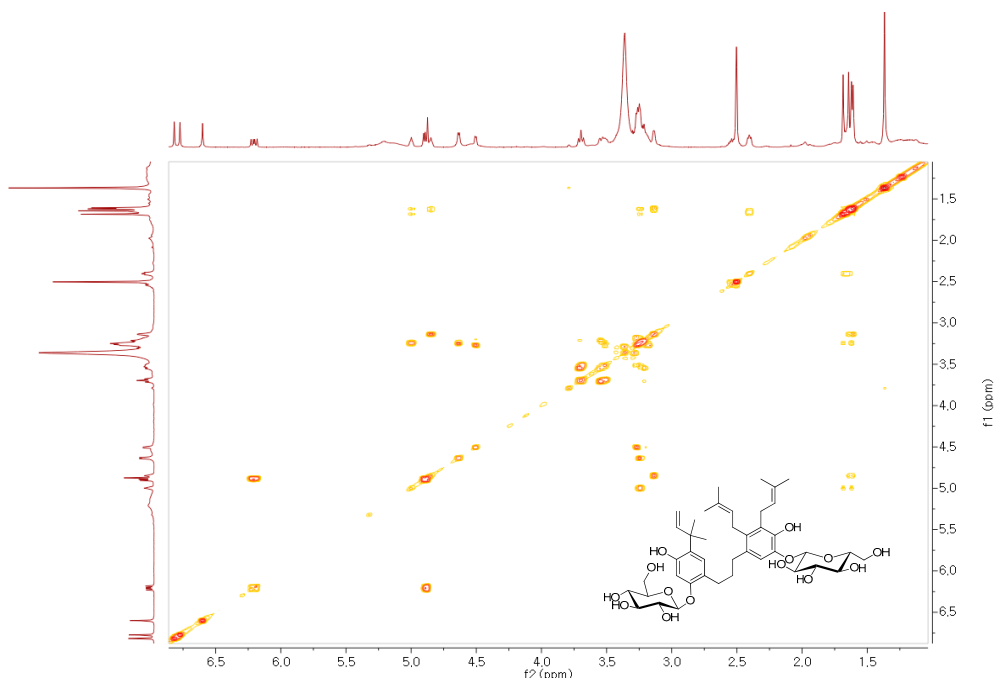

Figure S26. COSY spectrum of compound 7 recorded in DMSO-*d*<sub>6</sub>.

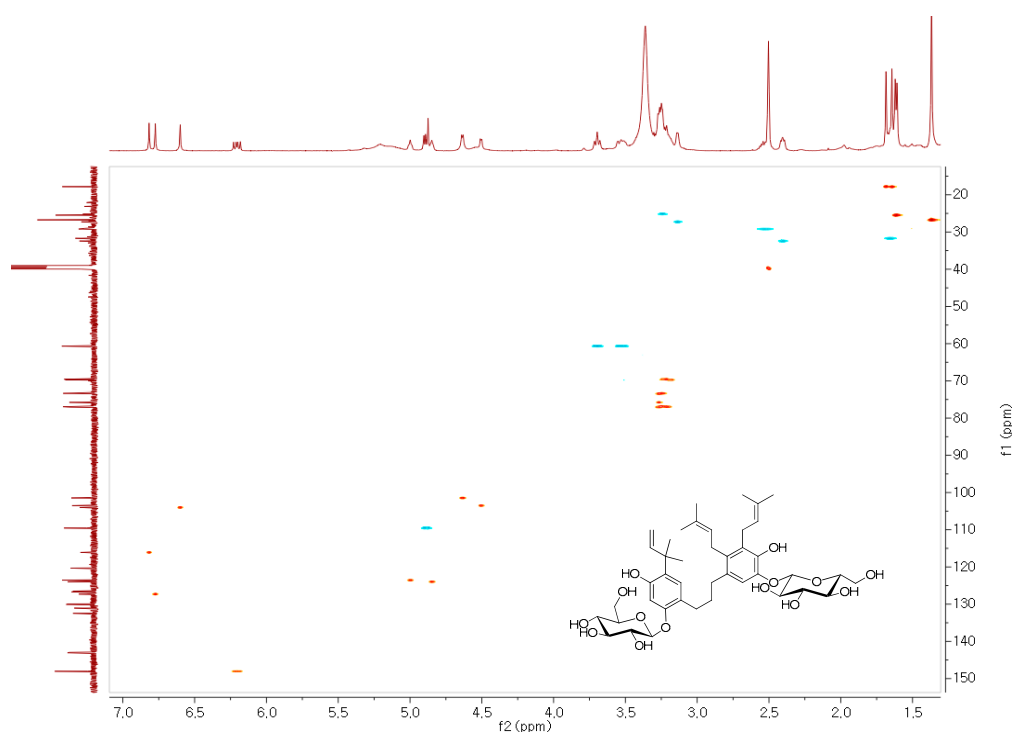

Figure S27. HSQC spectrum of compound **7** recorded in DMSO-*d*<sub>6</sub>.

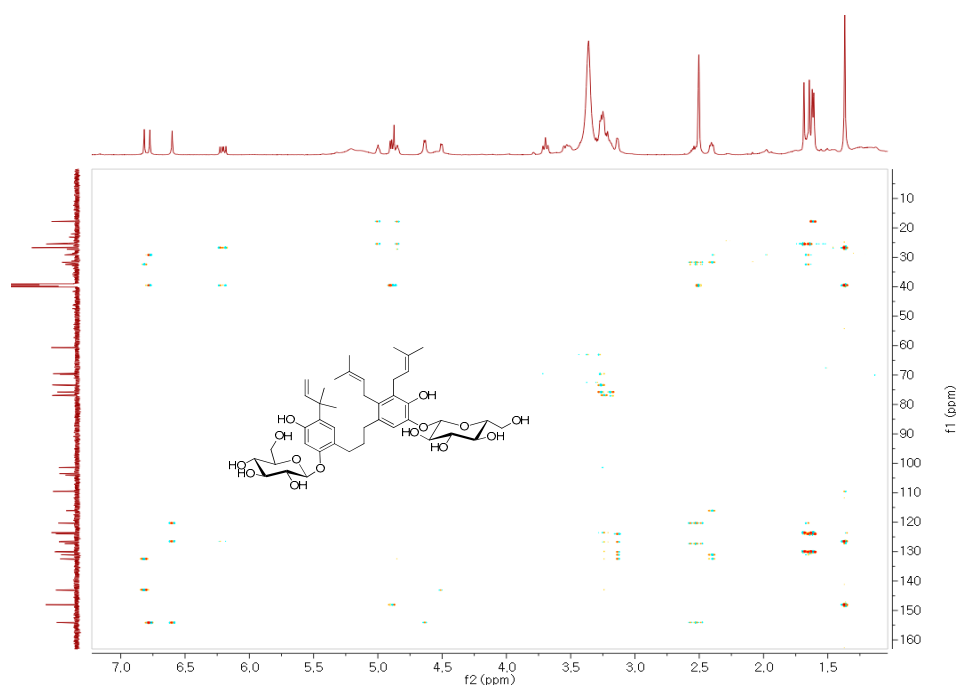

Figure S28. HMBC spectrum of compound **7** recorded in DMSO-*d*<sub>6</sub>.

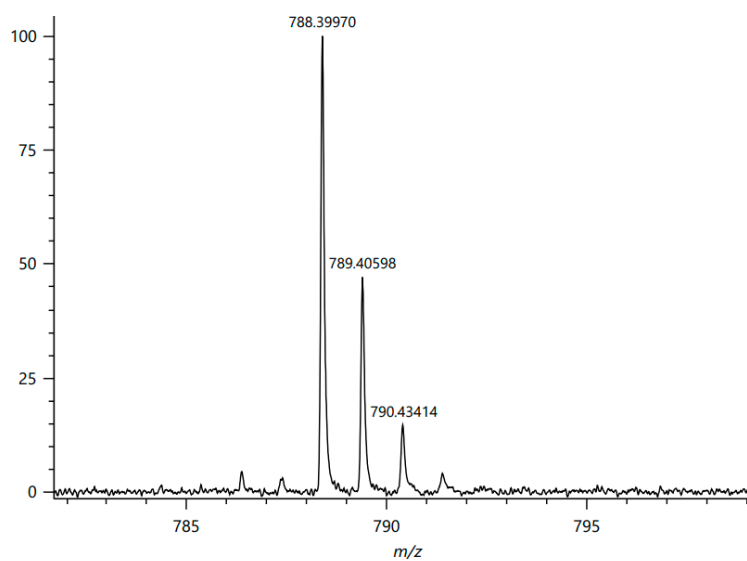

Figure S29. The HRFDMS spectrum of compound 7.

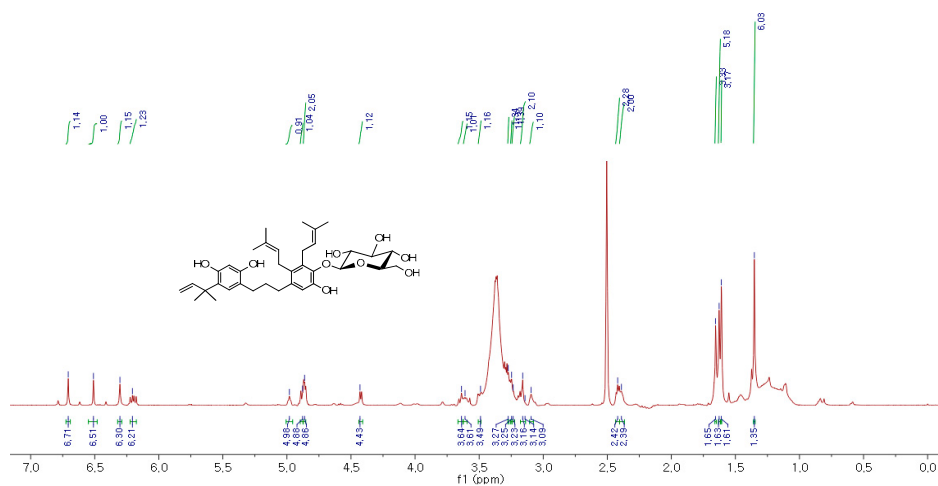

Figure S30.  $^1\text{H}$  NMR spectrum of compound 8 recorded at 600 MHz in  $\text{DMSO}-d_6$ .

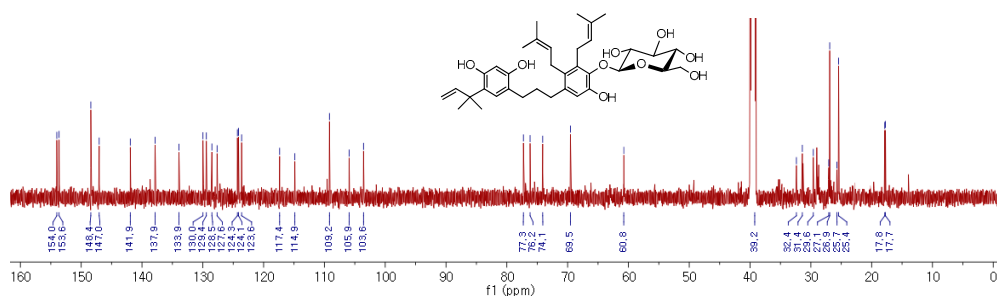

Figure S31.  $^{13}\text{C}$  NMR spectrum of compound 8 recorded at 150 MHz in  $\text{DMSO}-d_6$ .

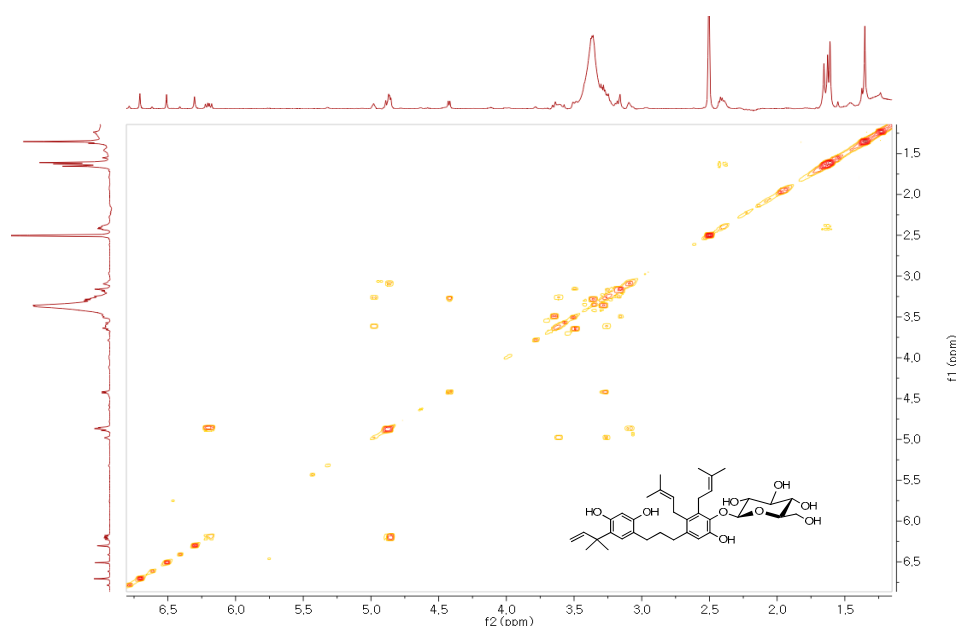

Figure S32. COSY spectrum of compound **8** recorded in DMSO-*d*<sub>6</sub>.

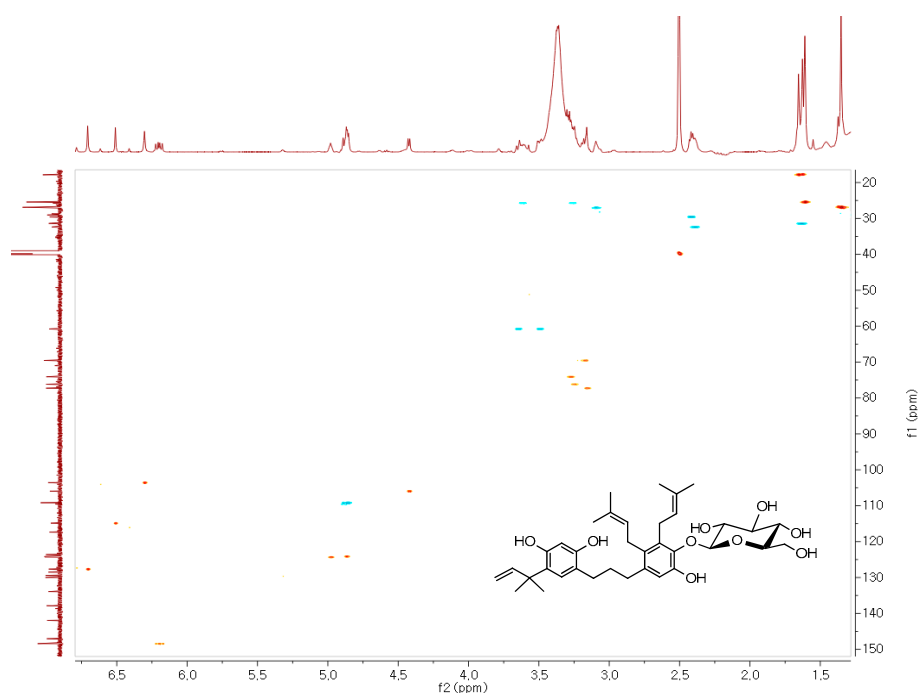

Figure S33. HSQC spectrum of compound **8** recorded in DMSO-*d*<sub>6</sub>.

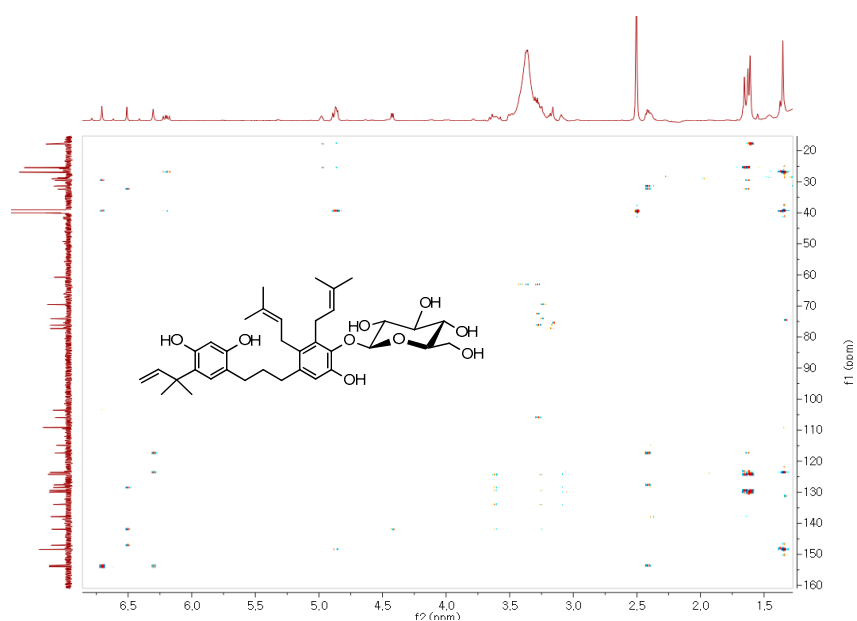

Figure S34. HMBC spectrum of compound 8 recorded in DMSO- $d_6$ .

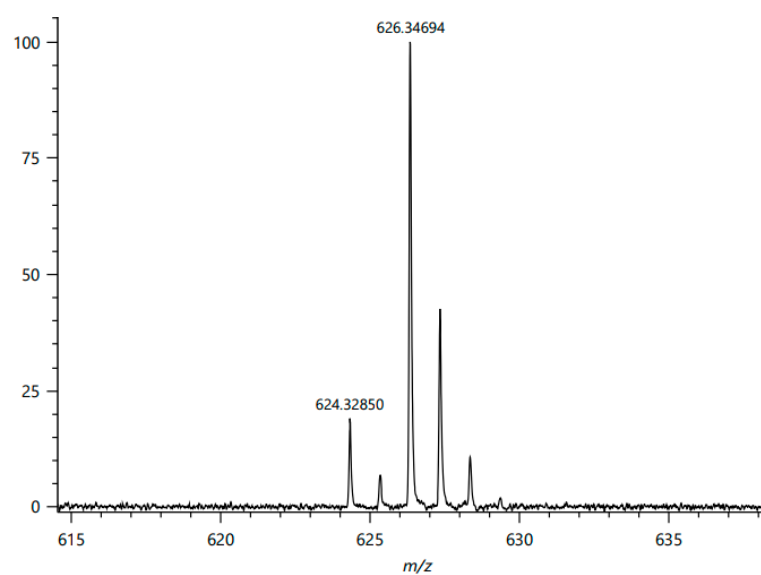

Figure S35. The HRFDMS spectrum of compound 8.

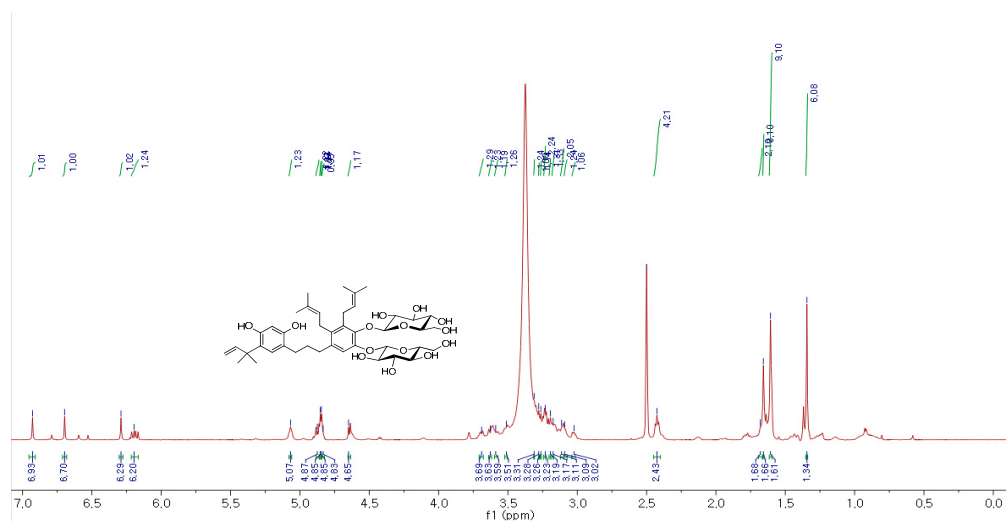

Figure S36.  $^1\text{H}$  NMR spectrum of compound 9 recorded at 600 MHz in DMSO- $d_6$ .

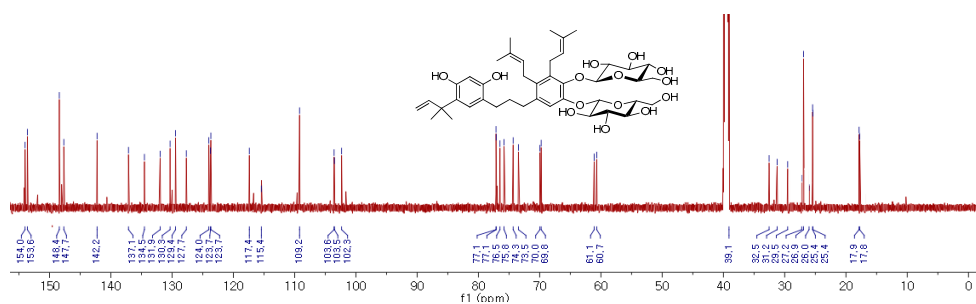

Figure S37.  $^{13}\text{C}$  NMR spectrum of compound **9** recorded at 150 MHz in  $\text{DMSO}-d_6$ .

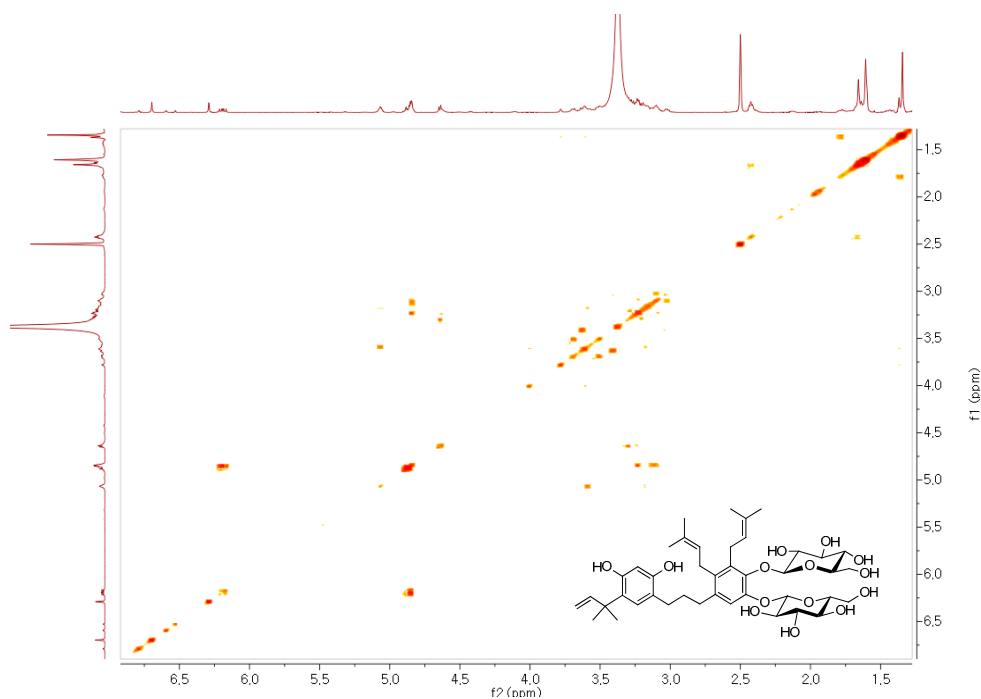

Figure S38. COSY spectrum of compound **9** recorded in  $\text{DMSO}-d_6$ .

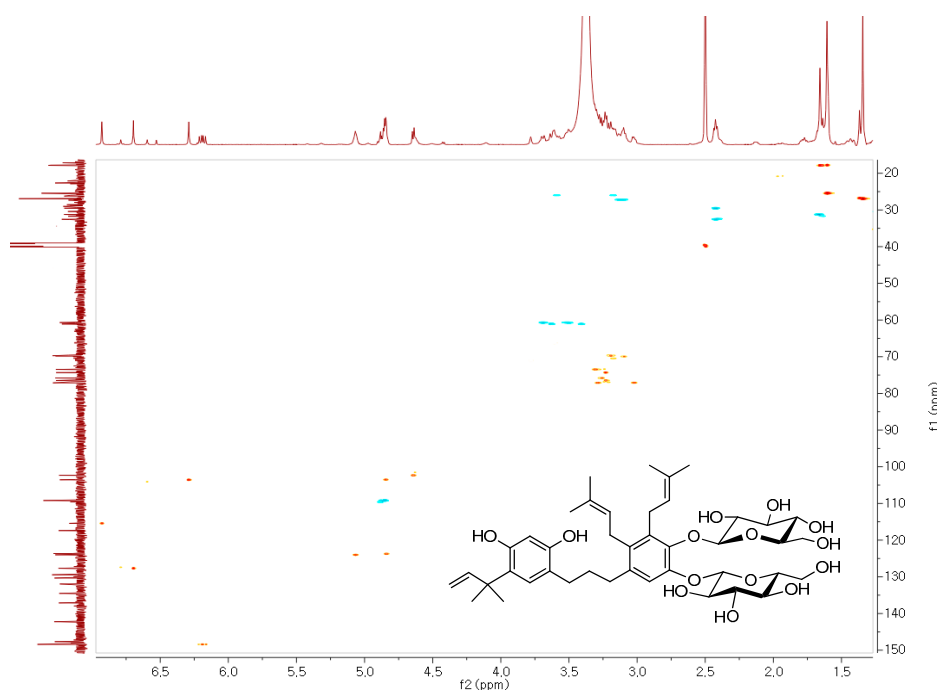

Figure S39. HSQC spectrum of compound **9** recorded in  $\text{DMSO}-d_6$ .

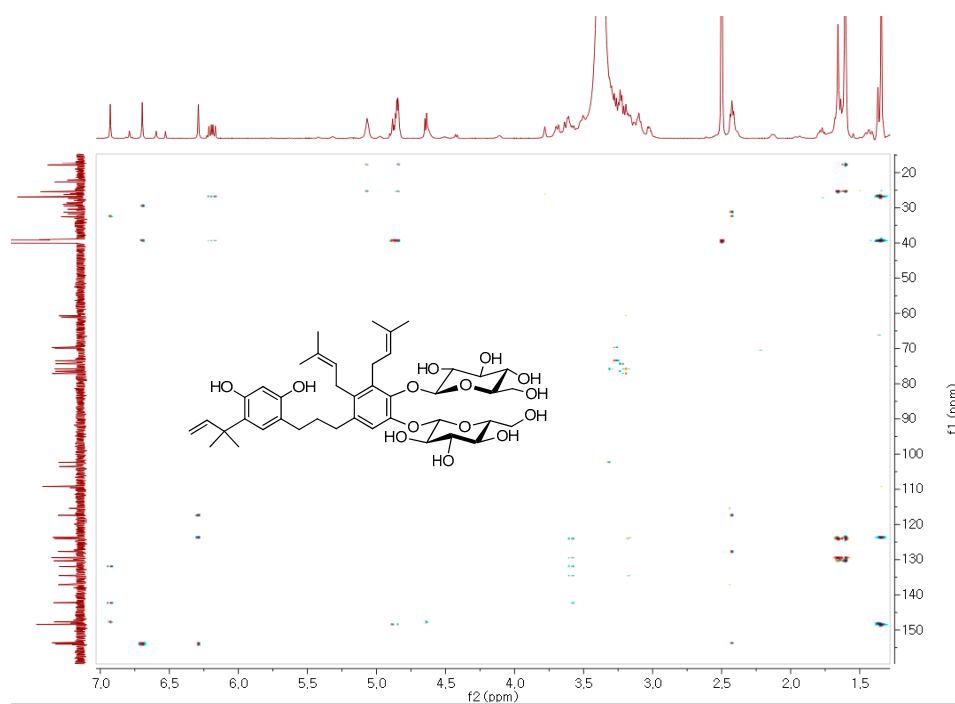

Figure S40. HMBC spectrum of compound 9 recorded in DMSO-*d*<sub>6</sub>.

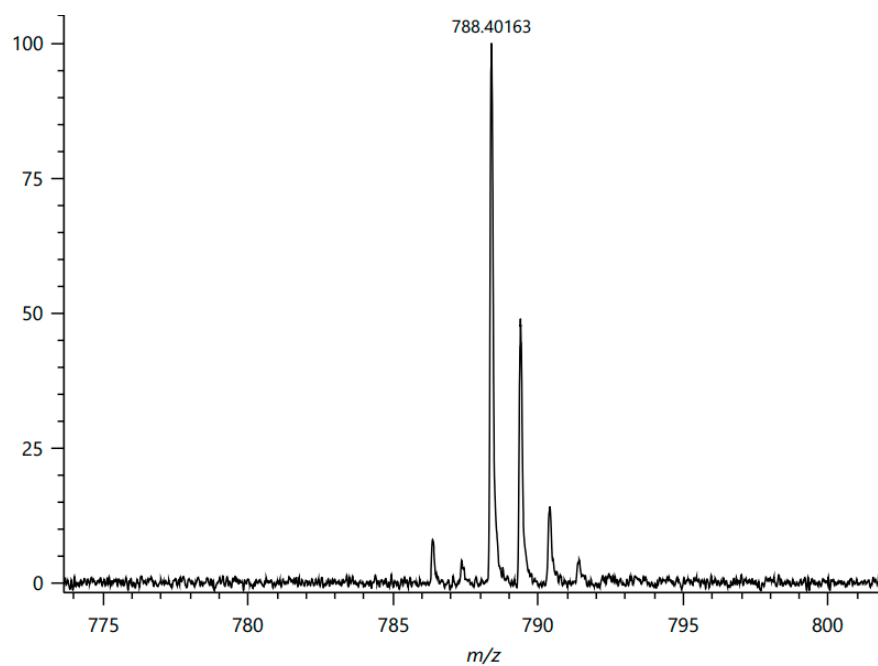

Figure S41. The HRFDMS spectrum of compound 9.

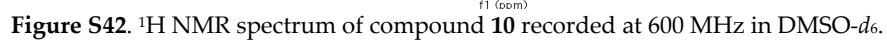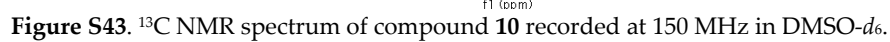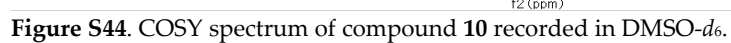

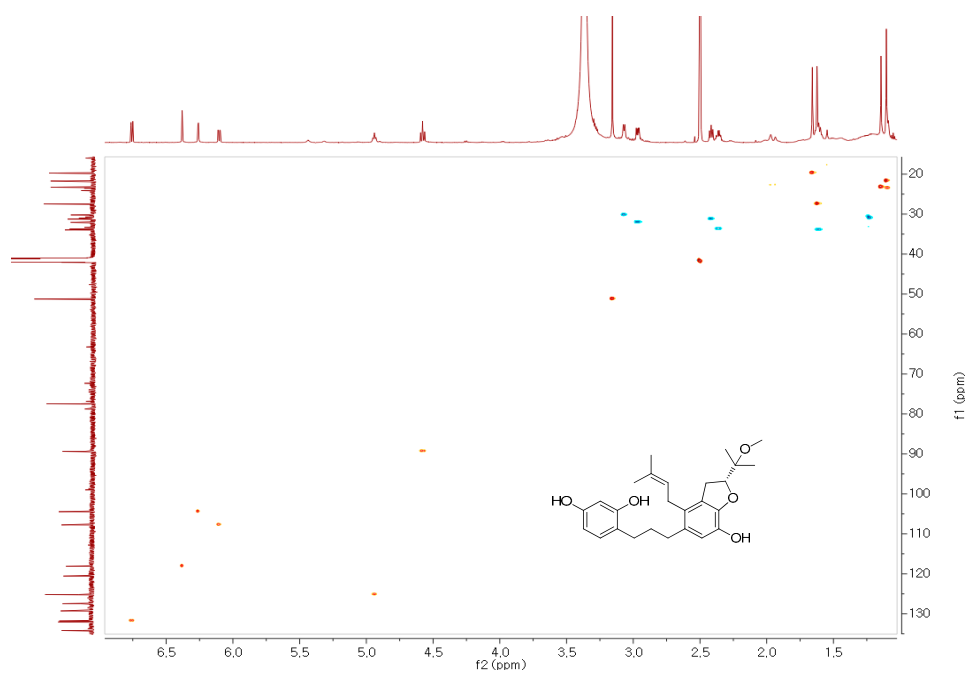

Figure S45. HSQC spectrum of compound **10** recorded in DMSO-*d*<sub>6</sub>.

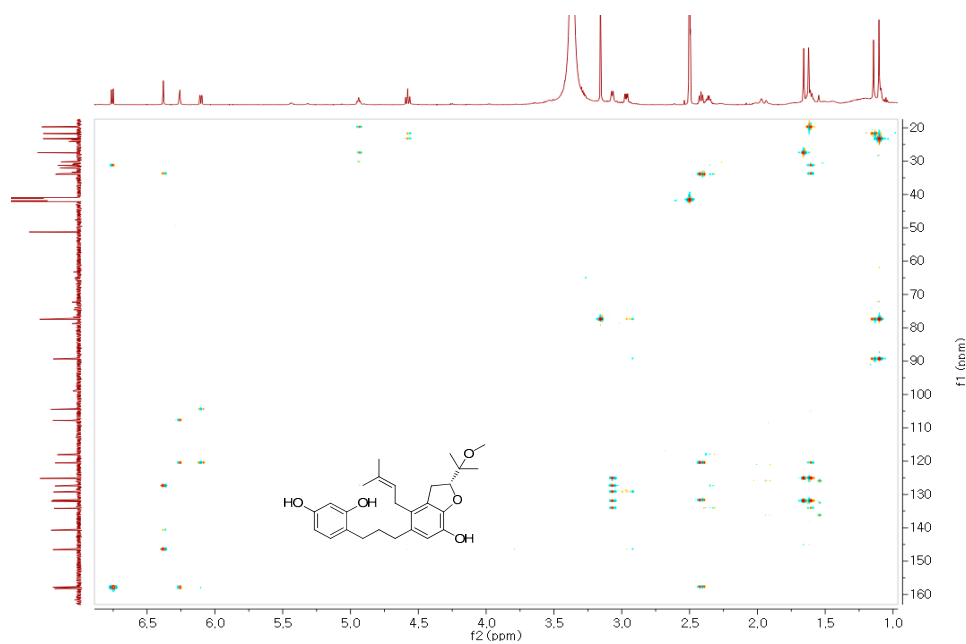

Figure S46. HMBC spectrum of compound **10** recorded in DMSO-*d*<sub>6</sub>.

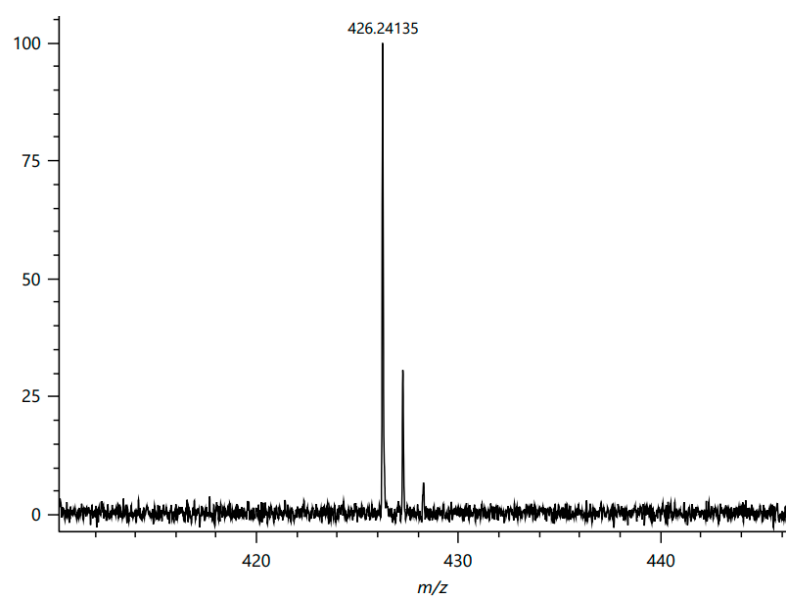

Figure S47. The HRFDMS spectrum of compound 10.

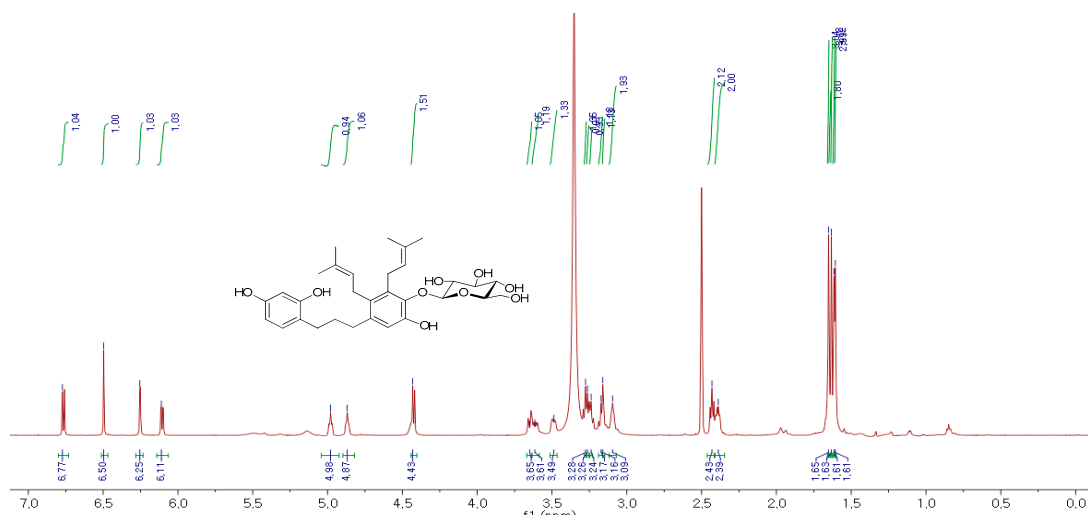

Figure S48.  $^1\text{H}$  NMR spectrum of compound 11 recorded at 600 MHz in  $\text{DMSO}-d_6$ .

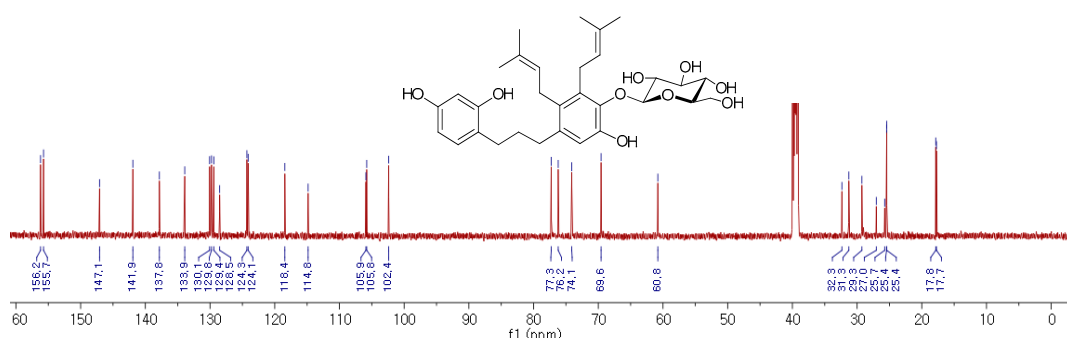

Figure S49.  $^{13}\text{C}$  NMR spectrum of compound 11 recorded at 150 MHz in  $\text{DMSO}-d_6$ .

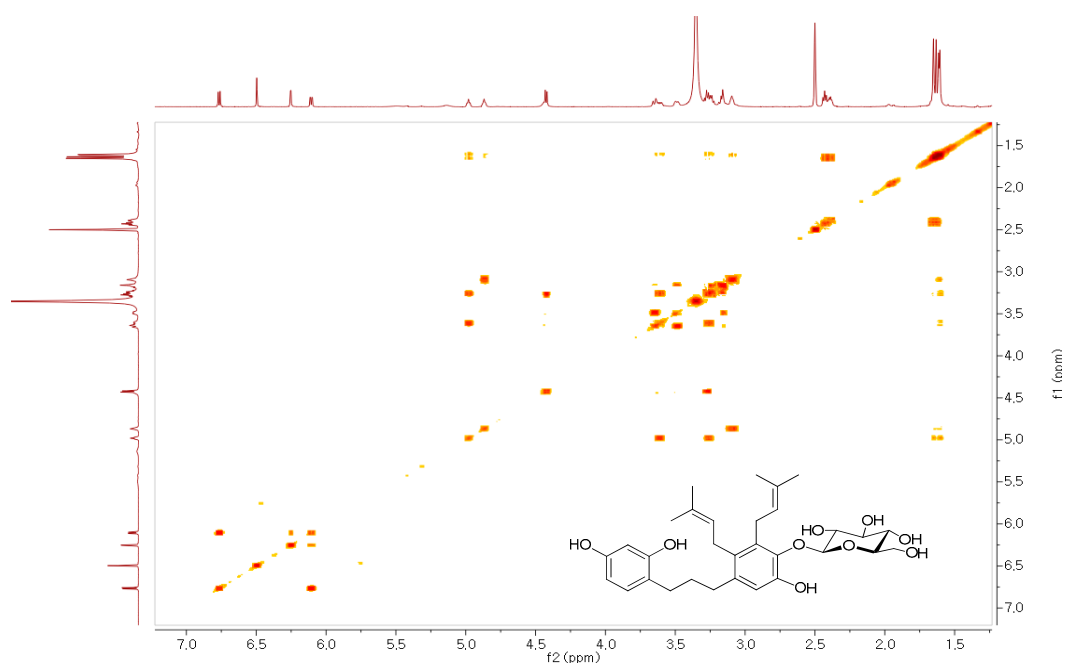

Figure S50. COSY spectrum of compound **11** recorded in DMSO-*d*<sub>6</sub>.

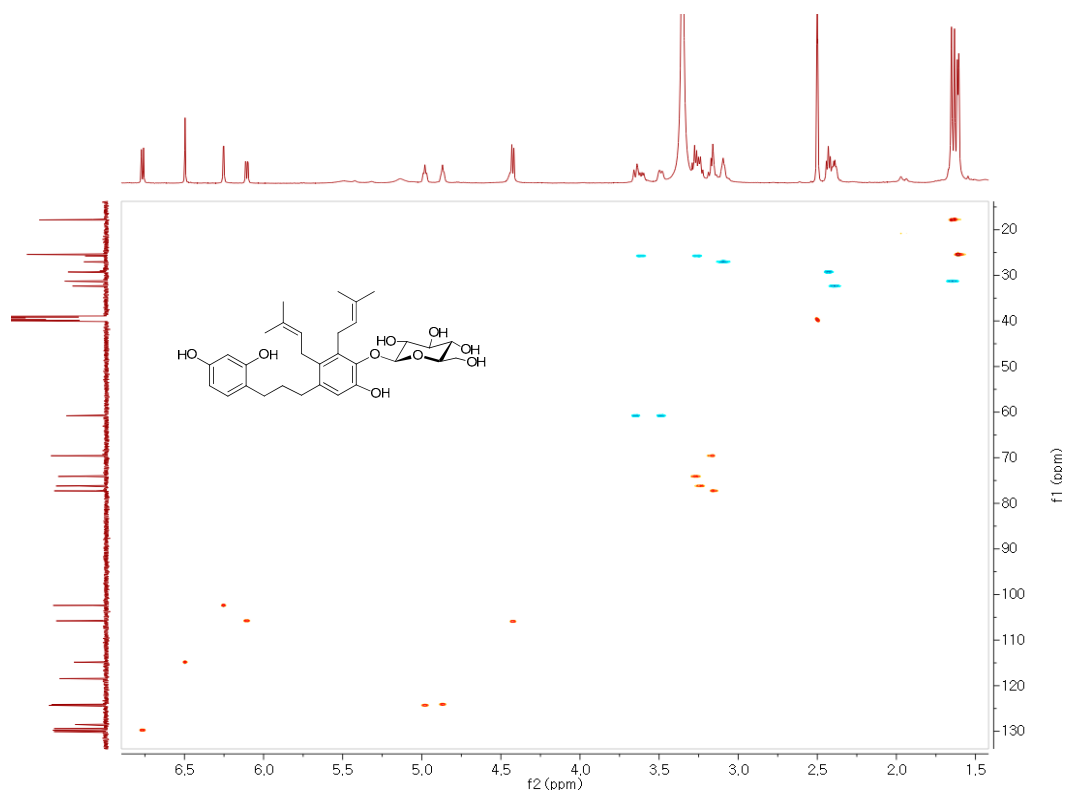

Figure S51. HSQC spectrum of compound **11** recorded in DMSO-*d*<sub>6</sub>.

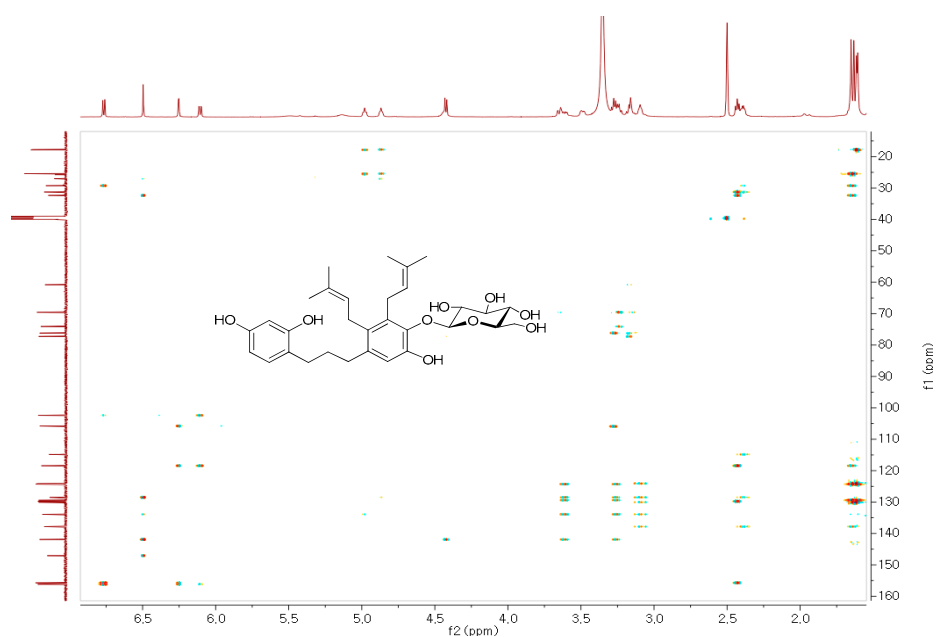

Figure S52. HMBC spectrum of compound 11 recorded in DMSO-*d*<sub>6</sub>.

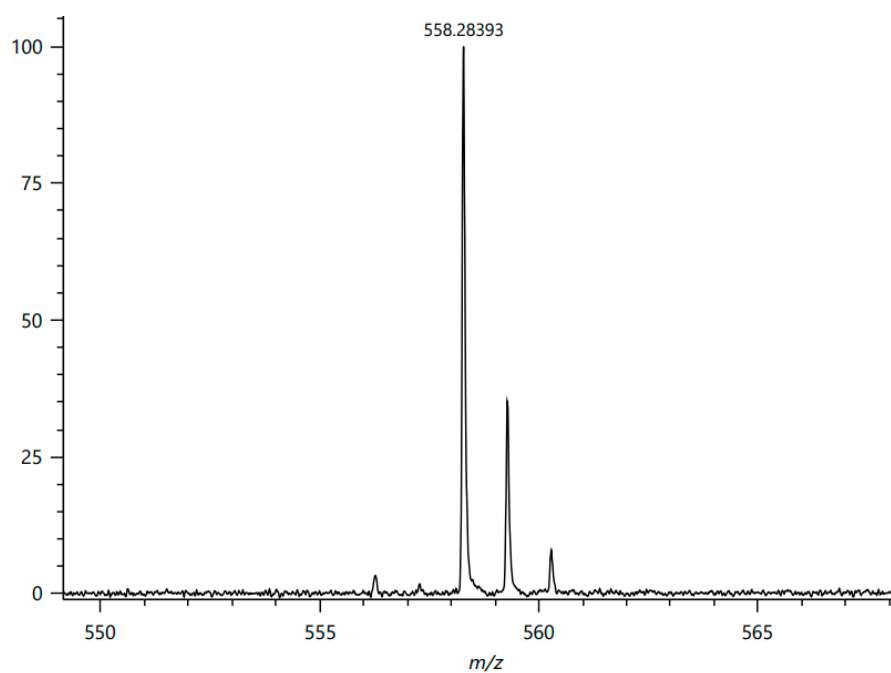

Figure S53. The HRFDMS spectrum of compound 11.
